# Supplementary material for: Foliar application of glycinebetaine and Zn fertilizer improves both the apparent and functional qualities of albino tea [Camellia sinensis (L.) O. Kuntze]
Source: Royal Society of Chemistry journal article supplement (doi:10.1039/d1fo01398j), 2021-01-01
Supplement: d1fo01398j1.pdf [file d1fo01398j1.pdf]

## Electronic Supplementary Information

**Foliar application of glycinebetaine and Zn fertilizer improves both apparent and functional qualities of albino tea [*Camellia sinensis* (L.) O. Kuntze]**

Shan Huang <sup>1</sup>, Ting Zuo <sup>1</sup>, Xin Zheng <sup>2</sup>, Chao Zhuo <sup>3</sup>, Qiong Hou <sup>1</sup>, Longren Yao <sup>1</sup>, Xiaojun Wang <sup>1</sup>, Jian Wang <sup>1</sup>, Wuzhong Ni <sup>1,\*</sup>

<sup>1</sup> College of Environmental and Resource Sciences, Zhejiang University, Zhejiang Provincial Key Laboratory of Agricultural Resources and Environment, Hangzhou, Zhejiang, 310058, China

<sup>2</sup> Zhejiang Environment Technology Co., Ltd., Hangzhou, Zhejiang, 311100, China

<sup>3</sup> Zhejiang Anji Summit Angeltea Co., Ltd., Anji, Zhejiang, 313300, China

\*Corresponding author. Tel: +86-571-88982055. E-mail address: wzni@zju.edu.cn

## Tab of Contents

|                                                                                 |   |
|---------------------------------------------------------------------------------|---|
| 1. HPLC profile of amino acids standard compounds.....                          | 3 |
| 2. HPLC profile of catechins, alkaloids and gallic acid standard compounds..... | 4 |

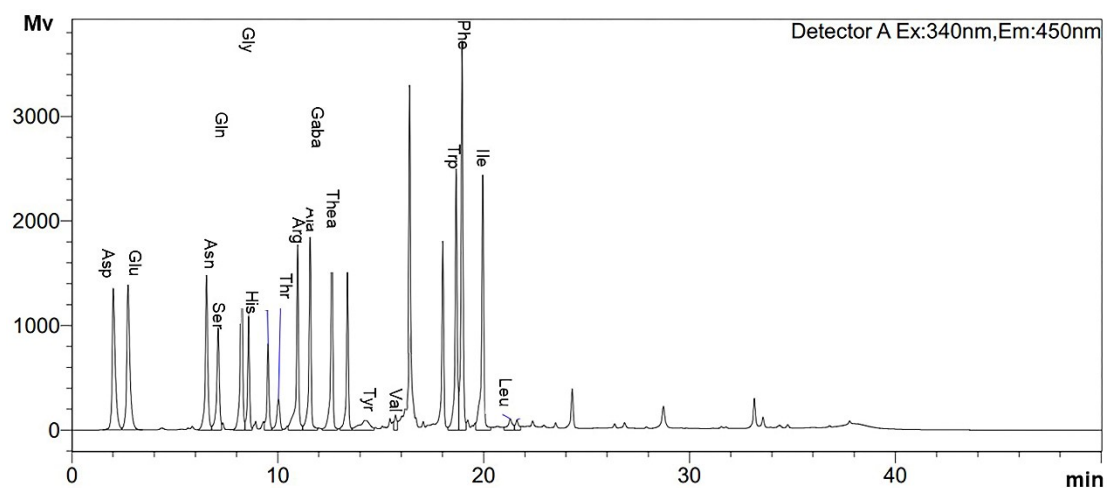

**Fig. S1 HPLC profile of amino acids standard compounds.** Asp: aspartic acid; Glu: glutamic acid; Asn: asparagine; Ser: serine; Gln: glutamine; His: histidine; Gly: glycine; Thr: threonine; Arg: arginine; Ala: alanine; Gaba:  $\gamma$ -aminobutyric acid; Thea: theanine; Tyr: tyrosine; Val: valine; Trp: tryptophane; Phe: phenylalanine; Ile: isoleucine; Leu: leucine.

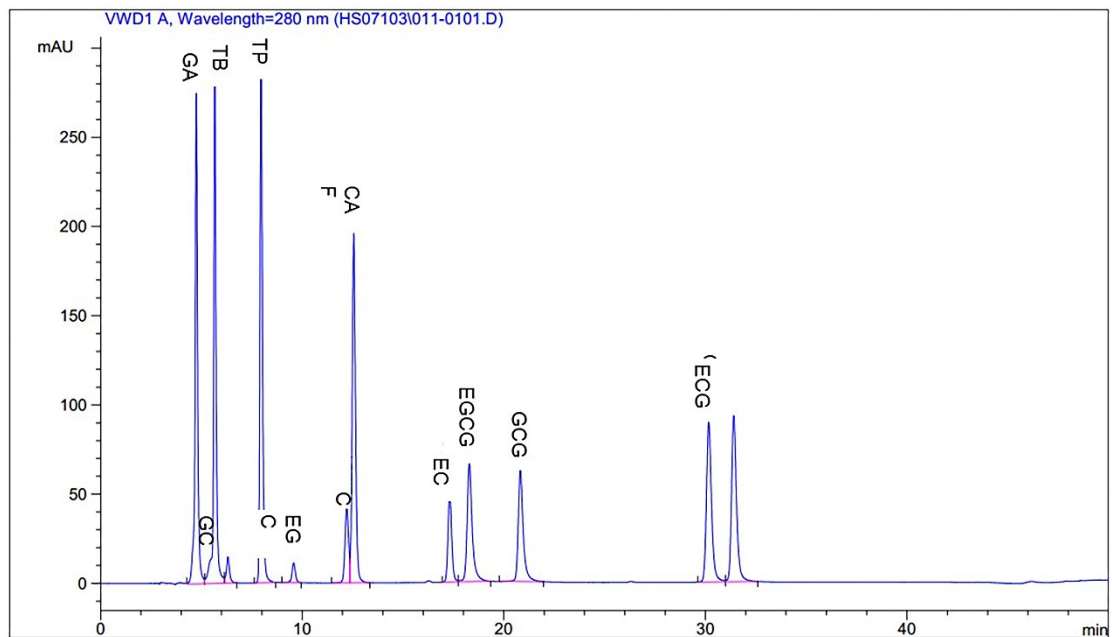

**Fig. S2 HPLC profile of 8 catechins (GC, EGC, C, EC, EGCG, GCG, ECG and CG), 3 alkaloids (TB, TP and CAF) and GA standard compounds. GA: gallic acid; TB: theobromine; GC: gallic acid; TP: theophylline; EGC: epigallocatechin; C: catechin; CAF: caffeine; EC: epicatechin; EGCG: epigallocatechin gallate; GCG: gallic acid; ECG: epicatechin gallate; CG: catechin gallate.**
