# Supplementary material for: Foliar application of glycinebetaine and Zn fertilizer improves both the apparent and functional qualities of albino tea [Camellia sinensis (L.) O. Kuntze]
Source: Royal Society of Chemistry journal article supplement (doi:10.1039/d1fo01398j), 2021-01-01
Supplement: d1fo01398j2.xlsx [file d1fo01398j2.xlsx]

## Sheet: Table S1
Table S1 Component score coefficient
	p[1]	p[2]
Chla	-0.0803599	0.0222186
Chlb	-0.00968679	0.0629075
Car	0.051747	0.0609872
Asp	0.0146775	0.116357
Glu	-0.0436367	0.102997
Asn	-0.054987	0.0880195
Ser	0.00116105	0.0783696
Gln	-0.0202861	0.097168
His	0.00432074	0.0843654
Gly	0.132028	-0.0281384
Thr	0.0986375	-0.00735449
Arg	0.0524905	0.0963066
Ala	0.0652134	0.0960268
Gaba	0.129187	-0.00891955
Thea	0.0936166	-0.00200937
Tyr	-0.0387628	-0.00469564
Val	0.126474	0.00242677
Trp	-0.064896	-0.0588658
Phe	-0.0789305	0.014719
Ile	-0.0791849	0.0422554
Leu	-0.0757375	-0.0250773
GC	-0.015466	0.0854296
EGC	-0.0215392	0.0786841
C	-0.0833817	0.0854022
EC	0.0871377	0.0235933
EGCG	-0.0030895	-0.0819329
GCG	-0.0518561	-0.0999713
ECG	0.00206344	-0.059864
CG	-0.00558581	0.041938
TB	-0.00133374	-0.0973504
TP	-0.0254483	-0.0278525
CAF	-0.0596861	-0.00839426
GA	-0.0367806	0.0231023

## Sheet: Table S2
Table S2 Correlation coefficient
	Chla	Chlb	Car	Asp	Glu	Asn	Ser	Gln	His	Gly	Thr	Arg	Ala	Gaba	Thea	Tyr	Val	Trp	Phe	Ile	Leu	GC	EGC	C	EC	EGCG	GCG	ECG	CG	TB	TP	CAF	GA
Chla	1	0.379725	-0.343056	-0.261614	0.0909678	0.157158	0.154164	0.181639	0.328968	-0.668493	-0.0264401	-0.174468	-0.334224	-0.651514	-0.849482	0.0700454	-0.606147	0.174466	-0.159252	0.494969	0.409002	-0.309225	0.199595	0.0641223	-0.526607	-0.506988	0.0345891	-0.374875	-0.0331855	-0.416966	-0.251053	-0.32938	-0.00495773
Chlb	0.379725	1	-0.0624706	0.426683	-0.119978	0.324655	0.190498	0.162836	0.0845483	-0.251295	-0.00900977	-0.00384698	-0.0779579	0.0108207	-0.00846371	0.375756	-0.109836	-0.201654	-0.00572795	-0.198993	0.0401841	0.0273946	0.337779	0.0735487	-0.0929098	-0.665877	-0.332404	-0.797787	0.00622768	-0.791913	-0.694263	-0.360601	0.0286863
Car	-0.343056	-0.0624706	1	0.454442	0.230899	0.33701	0.0953248	-0.0990509	0.389747	0.343117	0.236493	0.449992	0.495237	0.446025	0.367564	0.120408	0.20204	-0.422534	-0.0335834	0.109631	-0.0528928	0.224814	-0.0781164	0.0817653	0.327026	-0.254181	-0.554185	-0.10889	0.42834	-0.116531	-0.193891	-0.161757	-0.0168446
Asp	-0.261614	0.426683	0.454442	1	0.593735	0.489182	0.300965	0.515238	0.205576	0.0204556	-0.149083	0.599696	0.604902	0.198932	0.318403	-0.0567211	0.212933	-0.206602	0.212139	0.0119148	-0.174756	0.754197	0.5139	0.555393	0.385515	-0.29872	-0.534191	-0.320826	0.330839	-0.469734	-0.119296	0.098672	0.159608
Glu	0.0909678	-0.119978	0.230899	0.593735	1	0.356783	0.337027	0.659066	0.341148	-0.342189	-0.20267	0.523385	0.560958	-0.338699	-0.2241	-0.395279	-0.139531	0.0577935	0.348624	0.547808	-0.0144713	0.687501	0.564678	0.73137	0.0454155	-0.153801	-0.342599	0.00395117	0.336901	-0.181457	0.290083	0.320503	0.156362
Asn	0.157158	0.324655	0.33701	0.489182	0.356783	1	0.142088	0.382305	0.384485	-0.419554	-0.587492	0.240586	0.222826	-0.319728	-0.000945429	0.487096	-0.428965	-0.28136	0.328625	0.373863	-0.10141	0.312939	0.0747809	0.740089	-0.0116682	-0.246211	-0.233503	-0.165071	0.243674	-0.378475	-0.0944354	0.357941	0.221987
Ser	0.154164	0.190498	0.0953248	0.300965	0.337027	0.142088	1	0.539382	0.681622	-0.111748	-0.0383193	0.605221	0.534	-0.111662	-0.0992456	0.143485	-0.0263073	-0.465283	-0.0600615	0.0780232	-0.152244	0.138818	0.00914298	0.15717	-0.248204	-0.149633	-0.591381	-0.157669	-0.395513	-0.24653	0.00935809	-0.148581	0.0922254
Gln	0.181639	0.162836	-0.0990509	0.515238	0.659066	0.382305	0.539382	1	0.488338	-0.209969	-0.162955	0.721453	0.609026	-0.331297	-0.200377	-0.322502	0.0129429	-0.195787	-0.0536868	0.337752	-0.430966	0.509504	0.378337	0.576037	0.0885382	-0.0228488	-0.276531	0.118794	-0.0630948	-0.236712	0.37797	0.193623	-0.134503
His	0.328968	0.0845483	0.389747	0.205576	0.341148	0.384485	0.681622	0.488338	1	-0.124317	0.118975	0.63762	0.483019	-0.154037	-0.223673	0.113038	-0.114007	-0.621344	-0.311626	0.249245	-0.189736	0.114281	-0.0504828	0.0996486	-0.157927	-0.299541	-0.5957	-0.051898	-0.1344	-0.260309	-0.0621182	-0.286734	-0.0810843
Gly	-0.668493	-0.251295	0.343117	0.0204556	-0.342189	-0.419554	-0.111748	-0.209969	-0.124317	1	0.618744	0.319801	0.433887	0.916582	0.669569	-0.323888	0.907946	-0.299929	-0.547229	-0.476469	-0.50437	-0.155702	-0.255061	-0.563079	0.683523	0.161507	-0.203115	0.188163	-0.0182408	0.168724	-0.00486681	-0.295966	-0.249719
Thr	-0.0264401	-0.00900977	0.236493	-0.149083	-0.20267	-0.587492	-0.0383193	-0.162955	0.118975	0.618744	1	0.177345	0.230226	0.573565	0.0777482	-0.476648	0.650102	-0.246298	-0.661833	-0.202941	-0.1732	-0.209771	0.0768413	-0.685995	0.311831	-0.366131	-0.339502	-0.173307	0.0824788	-0.195508	-0.294263	-0.770147	-0.418244
Arg	-0.174468	-0.00384698	0.449992	0.599696	0.523385	0.240586	0.605221	0.721453	0.63762	0.319801	0.177345	1	0.888872	0.233902	0.172932	-0.340503	0.408525	-0.441106	-0.349089	0.156369	-0.462317	0.397535	0.180668	0.226615	0.386326	-0.048078	-0.575981	0.115268	0.0136272	-0.137	0.25705	-0.101111	-0.136598
Ala	-0.334224	-0.0779579	0.495237	0.604902	0.560958	0.222826	0.534	0.609026	0.483019	0.433887	0.230226	0.888872	1	0.369212	0.34305	-0.317068	0.518779	-0.444232	-0.196931	0.136371	-0.573154	0.392246	0.137285	0.248806	0.414612	-0.113311	-0.718523	0.00768861	0.00508206	-0.204198	0.128475	-0.0267078	-0.167652
Gaba	-0.651514	0.0108207	0.446025	0.198932	-0.338699	-0.319728	-0.111662	-0.331297	-0.154037	0.916582	0.573565	0.233902	0.369212	1	0.783773	-0.151121	0.85343	-0.371934	-0.384369	-0.624143	-0.398923	-0.104913	-0.109409	-0.529701	0.671229	-0.0807941	-0.337471	-0.126002	0.102964	-0.0636817	-0.318152	-0.345246	-0.0645241
Thea	-0.849482	-0.00846371	0.367564	0.318403	-0.2241	-0.000945429	-0.0992456	-0.200377	-0.223673	0.669569	0.0777482	0.172932	0.34305	0.783773	1	0.137268	0.599908	-0.450152	0.116308	-0.699485	-0.577078	0.0972852	-0.168881	-0.145001	0.517807	0.189178	-0.239523	0.0129473	0.00956975	0.0942094	-0.160537	0.197982	0.0368763
Tyr	0.0700454	0.375756	0.120408	-0.0567211	-0.395279	0.487096	0.143485	-0.322502	0.113038	-0.323888	-0.476648	-0.340503	-0.317068	-0.151121	0.137268	1	-0.510876	-0.260822	0.353551	-0.14146	0.153492	-0.252175	-0.484146	0.0708875	-0.492565	-0.0899549	-0.119014	-0.317992	-0.305438	-0.127562	-0.437973	0.0965061	0.127308
Val	-0.606147	-0.109836	0.20204	0.212933	-0.139531	-0.428965	-0.0263073	0.0129429	-0.114007	0.907946	0.650102	0.408525	0.518779	0.85343	0.599908	-0.510876	1	-0.287674	-0.520914	-0.47706	-0.506753	0.118713	0.114506	-0.432985	0.759	0.0077294	-0.272313	0.0731322	0.0559274	-0.0555229	-0.011144	-0.338518	-0.149606
Trp	0.174466	-0.201654	-0.422534	-0.206602	0.0577935	-0.28136	-0.465283	-0.195787	-0.621344	-0.299929	-0.246298	-0.441106	-0.444232	-0.371934	-0.450152	-0.260822	-0.287674	1	0.159662	0.39827	0.60714	-0.0298443	0.105281	0.0735131	-0.236413	0.258634	0.529939	0.0973075	0.00479928	0.314679	0.284046	0.157182	-0.0715573
Phe	-0.159252	-0.00572795	-0.0335834	0.212139	0.348624	0.328625	-0.0600615	-0.0536868	-0.311626	-0.547229	-0.661833	-0.349089	-0.196931	-0.384369	0.116308	0.353551	-0.520914	0.159662	1	0.0527028	0.17517	0.358966	0.157597	0.636801	-0.315126	0.134222	0.136697	-0.0624077	0.177432	0.0792613	0.0488504	0.726437	0.379156
Ile	0.494969	-0.198993	0.109631	0.0119148	0.547808	0.373863	0.0780232	0.337752	0.249245	-0.476469	-0.202941	0.156369	0.136371	-0.624143	-0.699485	-0.14146	-0.47706	0.39827	0.0527028	1	0.382313	0.123818	0.128031	0.51137	-0.273143	-0.130706	-0.01649	0.0740293	0.186777	-0.0489509	0.319182	0.0765429	-0.102968
Leu	0.409002	0.0401841	-0.0528928	-0.174756	-0.0144713	-0.10141	-0.152244	-0.430966	-0.189736	-0.50437	-0.1732	-0.462317	-0.573154	-0.398923	-0.577078	0.153492	-0.506753	0.60714	0.17517	0.382313	1	-0.0383164	0.170855	-0.00298257	-0.416705	-0.187833	0.256435	-0.238798	0.182282	-0.0160256	-0.108454	-0.214798	0.316516
GC	-0.309225	0.0273946	0.224814	0.754197	0.687501	0.312939	0.138818	0.509504	0.114281	-0.155702	-0.209771	0.397535	0.392246	-0.104913	0.0972852	-0.252175	0.118713	-0.0298443	0.358966	0.123818	-0.0383164	1	0.597118	0.630271	0.286031	-0.0102066	-0.19609	0.0833197	0.367343	-0.168106	0.274582	0.288558	0.199488
EGC	0.199595	0.337779	-0.0781164	0.5139	0.564678	0.0747809	0.00914298	0.378337	-0.0504828	-0.255061	0.0768413	0.180668	0.137285	-0.109409	-0.168881	-0.484146	0.114506	0.105281	0.157597	0.128031	0.170855	0.597118	1	0.396097	0.296865	-0.495709	-0.0980575	-0.350342	0.567537	-0.553517	-0.0796264	-0.0692912	0.385476
C	0.0641223	0.0735487	0.0817653	0.555393	0.73137	0.740089	0.15717	0.576037	0.0996486	-0.563079	-0.685995	0.226615	0.248806	-0.529701	-0.145001	0.0708875	-0.432985	0.0735131	0.636801	0.51137	-0.00298257	0.630271	0.396097	1	-0.00243691	-0.00558497	-0.00755909	0.0559484	0.360523	-0.178279	0.31304	0.666273	0.336152
EC	-0.526607	-0.0929098	0.327026	0.385515	0.0454155	-0.0116682	-0.248204	0.0885382	-0.157927	0.683523	0.311831	0.386326	0.414612	0.671229	0.517807	-0.492565	0.759	-0.236413	-0.315126	-0.273143	-0.416705	0.286031	0.296865	-0.00243691	1	-0.00247314	0.00775505	0.197989	0.569994	-0.104722	0.128856	-0.00951632	0.213556
EGCG	-0.506988	-0.665877	-0.254181	-0.29872	-0.153801	-0.246211	-0.149633	-0.0228488	-0.299541	0.161507	-0.366131	-0.048078	-0.113311	-0.0807941	0.189178	-0.0899549	0.0077294	0.258634	0.134222	-0.130706	-0.187833	-0.0102066	-0.495709	-0.00558497	-0.00247314	1	0.574351	0.862119	-0.3294	0.92314	0.786919	0.602011	-0.124182
GCG	0.0345891	-0.332404	-0.554185	-0.534191	-0.342599	-0.233503	-0.591381	-0.276531	-0.5957	-0.203115	-0.339502	-0.575981	-0.718523	-0.337471	-0.239523	-0.119014	-0.272313	0.529939	0.136697	-0.01649	0.256435	-0.19609	-0.0980575	-0.00755909	0.00775505	0.574351	1	0.564054	0.139902	0.553479	0.503285	0.417121	0.193723
ECG	-0.374875	-0.797787	-0.10889	-0.320826	0.00395117	-0.165071	-0.157669	0.118794	-0.051898	0.188163	-0.173307	0.115268	0.00768861	-0.126002	0.0129473	-0.317992	0.0731322	0.0973075	-0.0624077	0.0740293	-0.238798	0.0833197	-0.350342	0.0559484	0.197989	0.862119	0.564054	1	-0.0419323	0.827122	0.896061	0.495548	-0.0773915
CG	-0.0331855	0.00622768	0.42834	0.330839	0.336901	0.243674	-0.395513	-0.0630948	-0.1344	-0.0182408	0.0824788	0.0136272	0.00508206	0.102964	0.00956975	-0.305438	0.0559274	0.00479928	0.177432	0.186777	0.182282	0.367343	0.567537	0.360523	0.569994	-0.3294	0.139902	-0.0419323	1	-0.26166	-0.0189406	0.0917929	0.451585
TB	-0.416966	-0.791913	-0.116531	-0.469734	-0.181457	-0.378475	-0.24653	-0.236712	-0.260309	0.168724	-0.195508	-0.137	-0.204198	-0.0636817	0.0942094	-0.127562	-0.0555229	0.314679	0.0792613	-0.0489509	-0.0160256	-0.168106	-0.553517	-0.178279	-0.104722	0.92314	0.553479	0.827122	-0.26166	1	0.704166	0.453506	-0.186753
TP	-0.251053	-0.694263	-0.193891	-0.119296	0.290083	-0.0944354	0.00935809	0.37797	-0.0621182	-0.00486681	-0.294263	0.25705	0.128475	-0.318152	-0.160537	-0.437973	-0.011144	0.284046	0.0488504	0.319182	-0.108454	0.274582	-0.0796264	0.31304	0.128856	0.786919	0.503285	0.896061	-0.0189406	0.704166	1	0.543985	-0.0271001
CAF	-0.32938	-0.360601	-0.161757	0.098672	0.320503	0.357941	-0.148581	0.193623	-0.286734	-0.295966	-0.770147	-0.101111	-0.0267078	-0.345246	0.197982	0.0965061	-0.338518	0.157182	0.726437	0.0765429	-0.214798	0.288558	-0.0692912	0.666273	-0.00951632	0.602011	0.417121	0.495548	0.0917929	0.453506	0.543985	1	0.275574
GA	-0.00495773	0.0286863	-0.0168446	0.159608	0.156362	0.221987	0.0922254	-0.134503	-0.0810843	-0.249719	-0.418244	-0.136598	-0.167652	-0.0645241	0.0368763	0.127308	-0.149606	-0.0715573	0.379156	-0.102968	0.316516	0.199488	0.385476	0.336152	0.213556	-0.124182	0.193723	-0.0773915	0.451585	-0.186753	-0.0271001	0.275574	1
